# Supplementary material for: Imaging brain class I histone deacetylase changes in the Lewy body dementias and Parkinson’s disease
Source: Research Square preprint supplement (doi:10.21203/rs.3.rs-6647341/v1), 2025-08-11
Supplement: Supplementary file 1 [file 1487b0c8df110bfbee183d7d.docx]

**Additional Table 1**

| **Clinical Diagnosis** | **Age at death** | **Sex** | **Postmortem hours** | **Neuropathologic Diagnoses** |
| --- | --- | --- | --- | --- |
| DLB | 79 | F | 26 | 1. Lewy body disease (Braak 5-6), 2. Mesial temporal neurofibrillary tangles, 3. Cerebrovascular disease |
| DLB | 68 | M | 13 | 1. Lewy body disease (Braak 4-5), 2. Cerebrovascular disease, 3. Hypoxic/ischemic injury, 4. Age-related tau and beta-amyloid pathology |
| DLB | 76 | M | 16 | 1. Lewy body disease (Braak 5-6), 2. Cerebrovascular disease, 3. AD neuropathologic change (A3B1C0), 4. Aging-related tau astrogliopathy |
| DLB | 87 | M | 23 | 1. Lewy body disease (Braak 6), 2. AD neuropathologic change (A3B1C1), 3. Cerebrovascular disease |
| DLB | 75 | M | 5 | 1. Lewy body disease (Braak 4-5), 2. Mesial temporal neurofibrillary tangles, 3. Cerebrovascular disease |
| PD  (cognitively normal) | 86 | M | 2 | 1. Lewy body disease (Braak 4), 2. Cerebrovascular disease, 3. Hypoxic/ischemic injury |
| PD  (cognitively normal) | 58 | F | 31 | 1. Lewy body disease (Braak 3), 2. Cerebrovascular disease |
| PD  (cognitively normal) | 81 | F | 10 | 1. Lewy body disease (Braak 3), AD neuropathologic change (A1B1C1), 3. Cerebrovascular disease |
| PD  (cognitively impaired) | 78 | M | 30 | 1. Lewy body disease (Braak 4), Entorhinal/hippocampal neurofibrillary tangles, 3. Cerebrovascular disease |
| PD  (cognitively impaired) | 74 | M | 70 | 1. Lewy body disease (Braak 4), 2. Mesial temporal neurofibrillary tangles, 3. Cerebrovascular disease |
| HC | 59 | M | 31 | 1. Mesial temporal tauopathy, 2. Cerebrovascular disease |
| HC | 63 | M | 18 | 1. Cerebrovascular disease, 2. Hypoxic/ischemic injury, 3. AD neuropathic change (A1B0C0) |
| HC | 73 | M | 14 | 1. Cerebrovascular disease, 2. Hypoxic/ischemic injury 3. AD neuropathologic change (A1B0C1) |
| HC | 79 | F | 61 | 1. Mesial temporal neurofibrillary tangles, 3. Cerebrovascular disease, 3. Pituitary cyst, 4. Hypoxic/ischemic injury |
| HC | 68 | F | 28 | 1. Cerebrovascular disease. 2. Entorhinal neurofibrillary tangles |

Clinical diagnosis in life (including cognitive status at last clinic visit prior to death for PD), age at death, sex, postmortem hours, and primary, secondary, and (when applicable) tertiary and quaternary neuropathologic diagnosis for the 15 autopsy brain samples. Braak staging for Lewy body pathology and National Institute on Aging-Alzheimer’s Association ABC scoring for Alzheimer’s disease are reported, where applicable. DLB = dementia with Lewy bodies, PD = Parkinson’s disease, HC = healthy control, AD = Alzheimer’s disease.
